# Supplementary material for: Highly regenerable alkali-resistant magnetic nanoparticles inspired by mussels for rapid selective dye removal offer high-efficiency environmental remediation
Source: Royal Society of Chemistry journal article supplement (doi:10.1039/c5ta04840k), 2015-01-01
Supplement: c5ta04840k1.pdf [file c5ta04840k1.pdf]

## Supporting Information

### **Highly regenerable and alkali-resistant magnetic nanoparticles inspired by mussel for smartly selective dye removal toward high-efficiency environmental remediation**

Zhenxing Wang,<sup>a†</sup> Jing Guo,<sup>a†</sup> Jun Ma<sup>b</sup> and Lu Shao<sup>a\*</sup>

<sup>a</sup> School of Chemical Engineering and Technology, State Key Laboratory of Urban Water Resource and Environment (SKLUWRE), Harbin Institute of Technology, Harbin 150001, PR China.

<sup>b</sup> School of Municipal and Environmental Engineering, State Key Laboratory of Urban Water Resource and Environment (SKLUWRE), Harbin Institute of Technology, Harbin 150001, PR China.

<sup>†</sup>These authors contributed equally to this work.

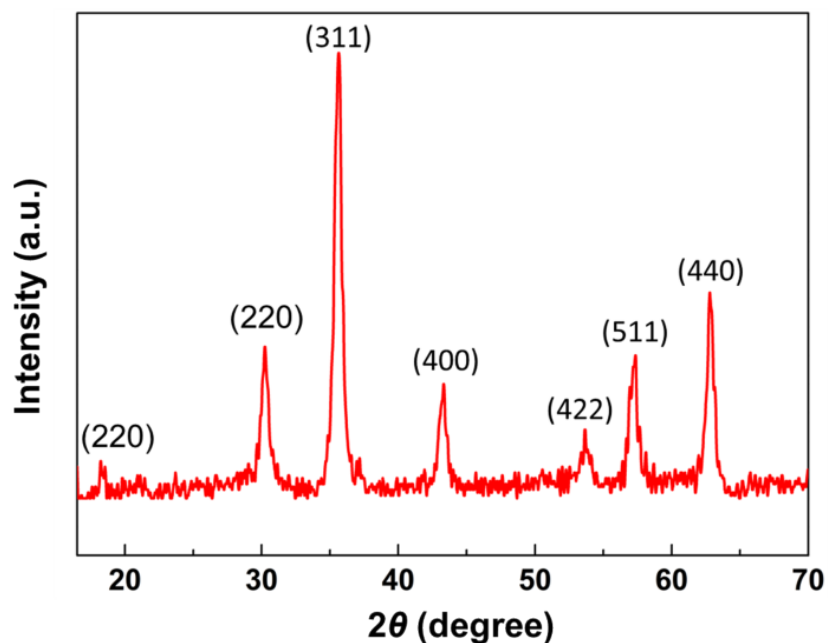

**Figure S1.** XRD patterns of magnetic nanoparticles fabricated by co-precipitation method.

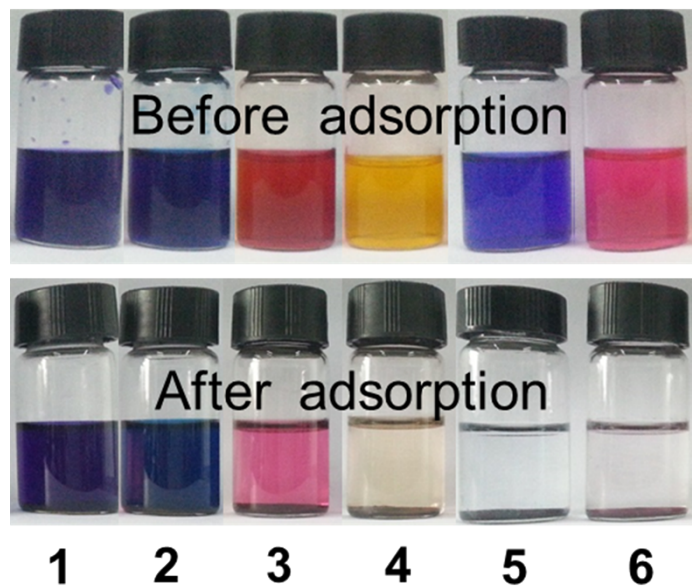

**Figure S2.** Photo images of different dyes (1-crystal violet, 2-methylene blue, 3-amaranth red, 4-orange G, 5-methyl blue and 6-rose bengal) before and after adsorption with  $\text{Fe}_3\text{O}_4@\text{PDA}/\text{PEI}$  adsorbents. The concentration of every dye is  $150 \text{ mg mL}^{-1}$ .
